# Supplementary material for: Wettability of hierarchically-textured ceramic coatings produced by suspension HVOF spraying
Source: Royal Society of Chemistry journal article supplement (doi:10.1039/c5ta02130h), 2015-01-01
Supplement: c5ta02130h1.pdf [file c5ta02130h1.pdf]

## Wettability of Hierarchically-Textured Ceramic Coatings produced by Suspension HVOF Spraying

Feifei Zhang<sup>a</sup>, Ben W. Robinson<sup>b</sup>, Heidi de Villiers-Lovelock<sup>c</sup>, Robert J.K. Wood<sup>a</sup> and Shuncai Wang<sup>a,\*</sup>

### Electronic Supplementary information (ESI)

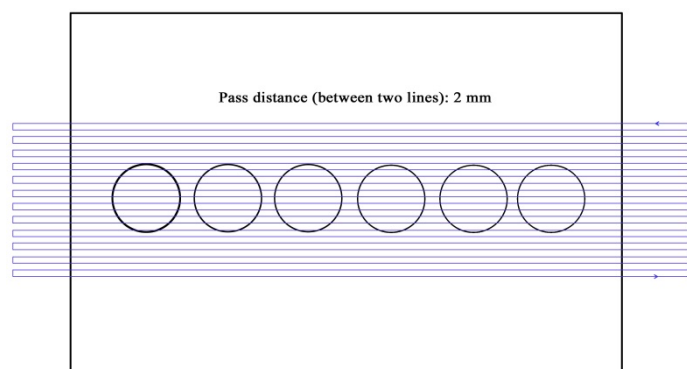

**Fig. S1** Spray route of the gun during the deposition process

**Table S1** Atomic fractions of elements in percent, as detected by XPS on the coating surfaces

| Peak | Position<br>BE (eV) | S-H-0 | S-H-15 |
|------|---------------------|-------|--------|
| Ti   | 459                 | 22.8  | 9.7    |
| O    | 532                 | 64.1  | 65.1   |
| C    | 285                 | 13.1  | 12.4   |
| B    | 191                 |       | 7.7    |
| N    | 399                 |       | 5.1    |

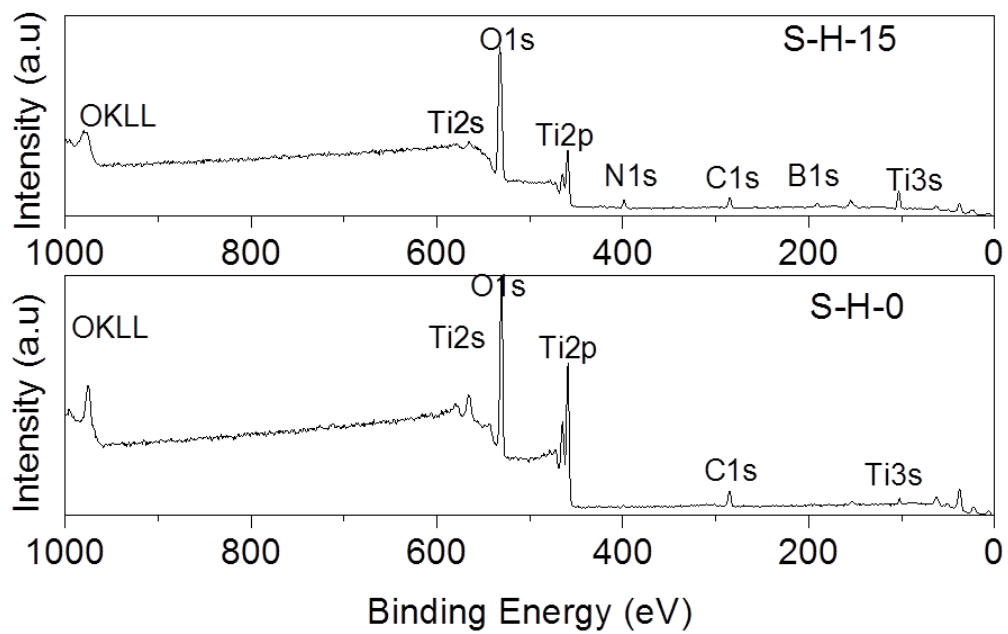

Fig. S2 XPS spectra of Coatings S-H-0 (bottom) and S-H-15 (top)

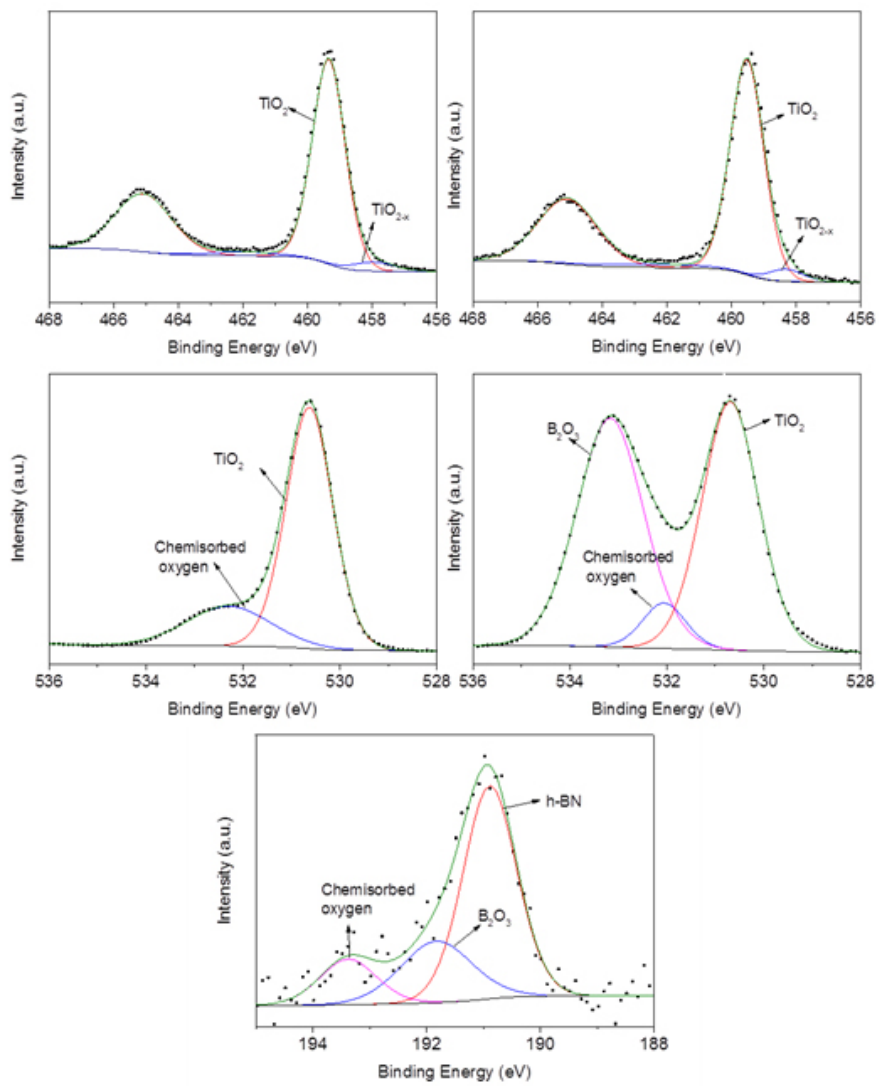

Fig. S3 High-resolution XPS spectra of Ti 2p, O1s and B 1s

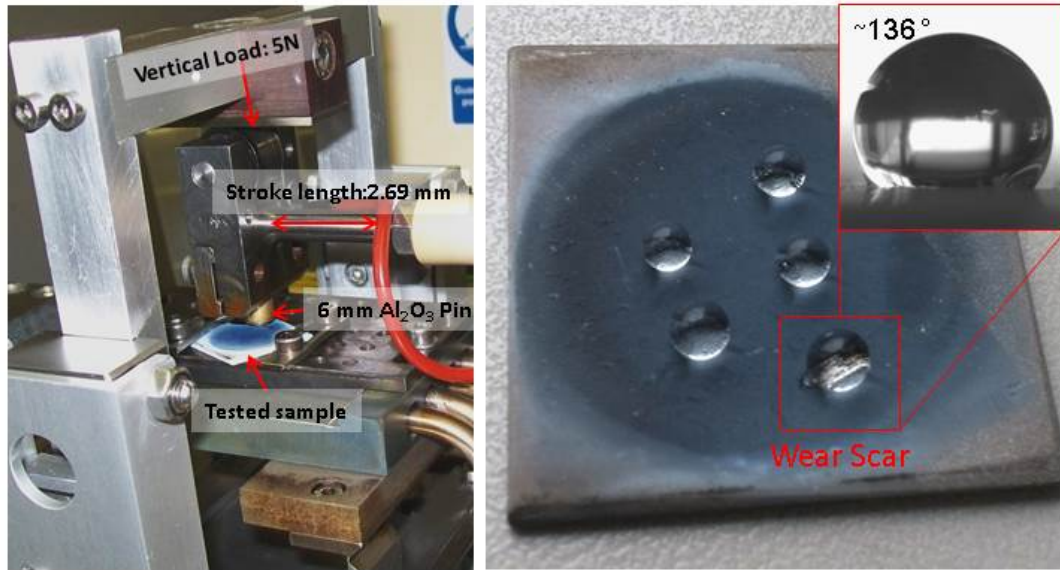

**Fig. S4** Sliding wear test on the superhydrophobic surface, showing a reduction of contact angle to ca.  $136^\circ$  in the wear scar
